# Supplementary material for: In vitro spermatogenesis in isolated seminiferous tubules of immature mice
Source: PubMed Central journal article supplement (PMC10079070; doi:10.1371/journal.pone.0283773), 2023-04-06
Supplement: pone.0283773.s001.pdf [file pone.0283773.s001.pdf]

## S1 Fig. *Acr/H3* double-Tg mouse testis as a system for monitoring spermatogenesis.

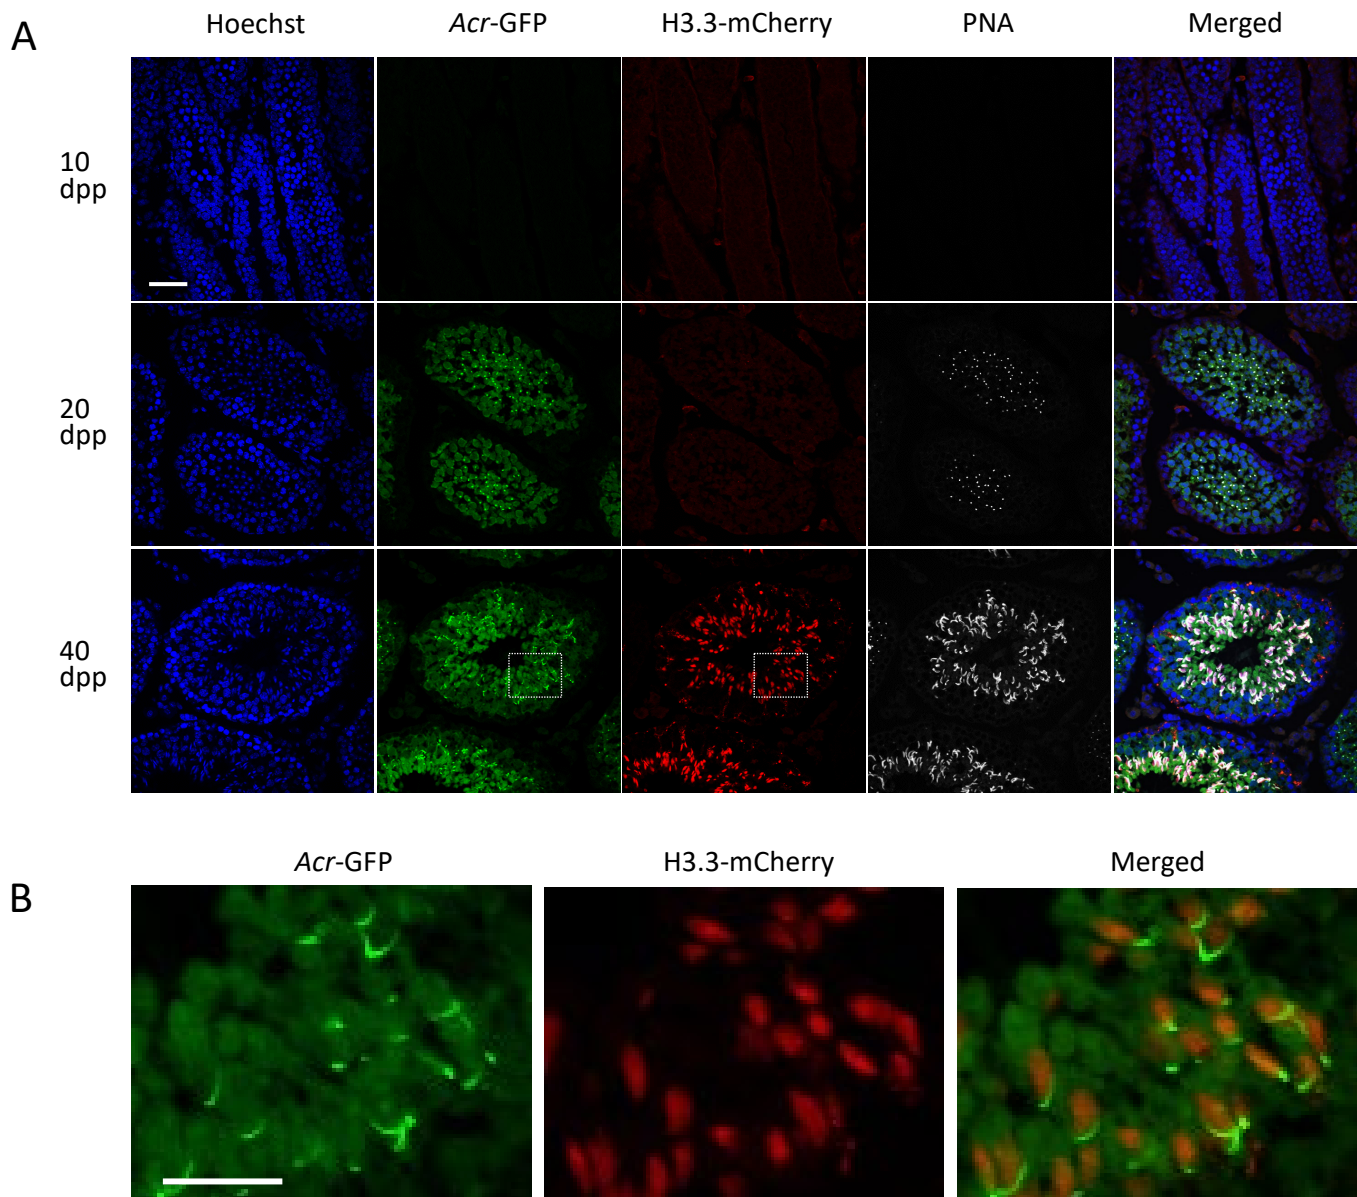

### ***Acr/H3* double-Tg mouse testis as a system for monitoring spermatogenesis.**

(A) Testes of *Acr/H3* double-Tg mice at ages of 10, 20, and 40 dpp were immunohistochemically examined with antibodies to GFP (green), mCherry (red), and PNA (gray). Nuclear staining was performed with Hoechst (blue). (B) Magnified immunohistochemical view of 40 dpp mouse testis. Dashed rectangular areas in A are enlarged in B. Elongating spermatids were stained with GFP and mCherry in the acrosome and nucleus, respectively. This double-staining pattern can be a reliable signature for identifying elongating spermatids. Scale bars: 50  $\mu$ m (A), 20  $\mu$ m (B).

## S2 Fig. Seminiferous tubule PDMS ceiling (STPC) chip.

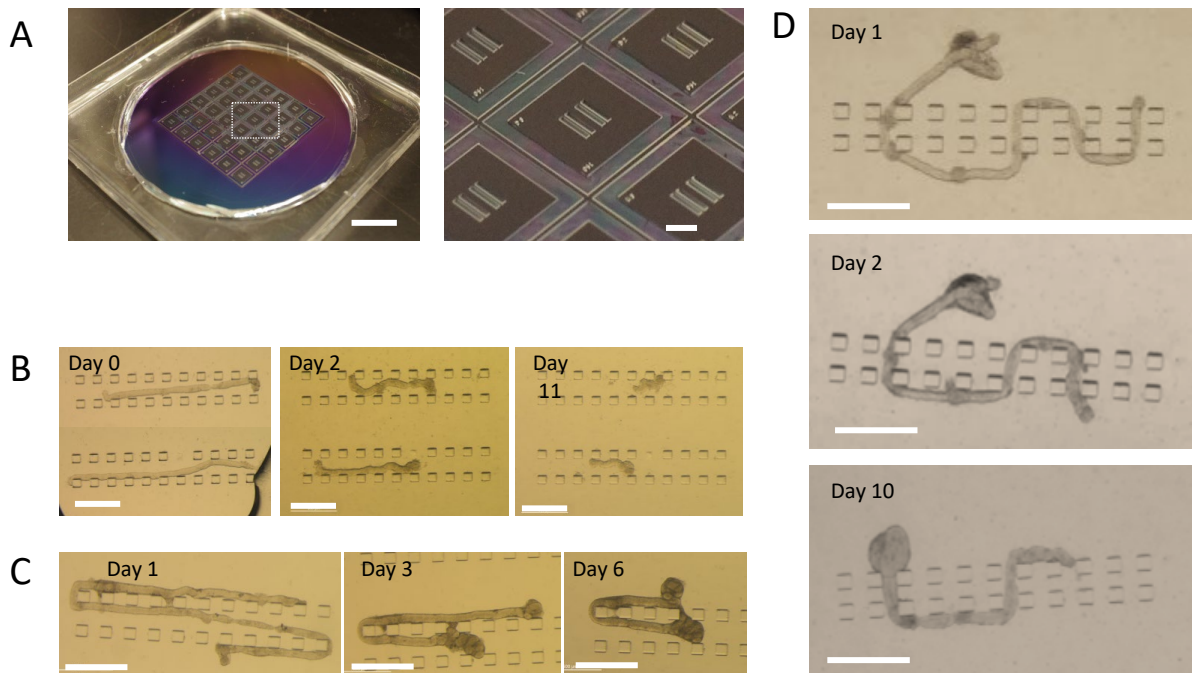

**Seminiferous tubule PDMS ceiling (STPC) chip.** (A) A mold for STPC chips. The dashed rectangular area is enlarged in the right panel, showing the mold for each single STPC chip. (B–D) Stereomicroscopic views of cut-isolated STs cultured beneath STPC chips under various settings. Scale bars: 2 cm (A left), 2 mm (A right), 500  $\mu$ m (B–D).

S3 Fig. Schematic presentation of the protocol of the soft agarose method.

### Method A

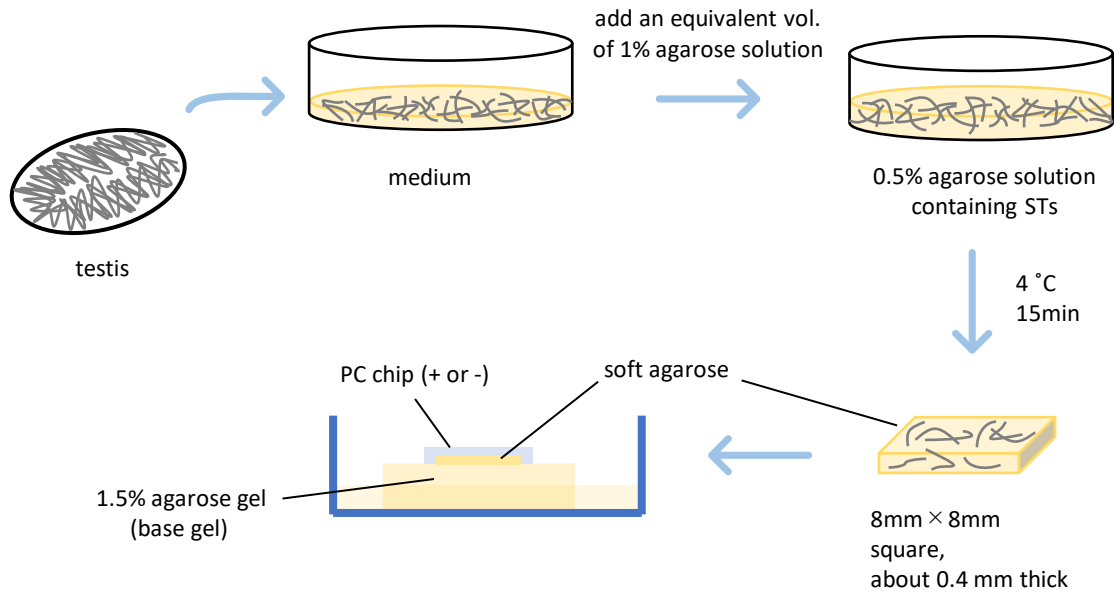

### Method B

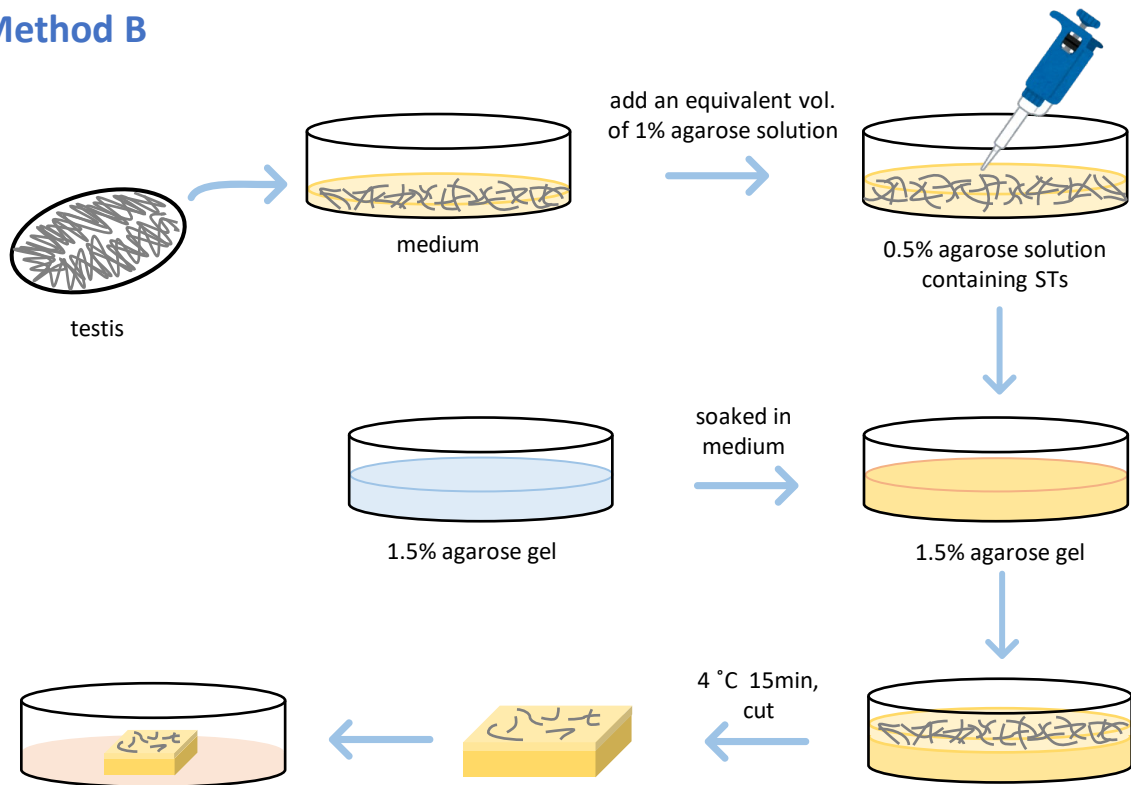

**Schematic presentation of the protocol of the soft agarose method.** In Method A, a soft agarose gel piece was cut out and transferred onto the base gel. In Method B, soft agarose was cooled down on the base gel. The two-layer gel was cut into squares and moved to a culture well. The volume of medium/agarose solution depended on the dish size.

#### S4 Fig. Effect of lower oxygen concentrations on spermatogenesis.

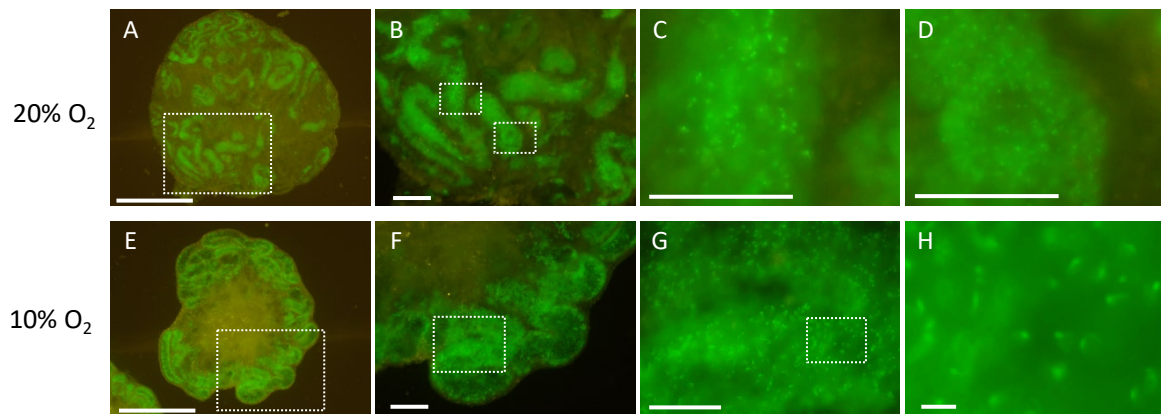

**Effect of lower oxygen concentrations on spermatogenesis.** Testis tissue masses of 1.5 dpp mice were cultured for 40 days at 20% or 10% O<sub>2</sub> concentration in an incubator. Dashed rectangular areas are enlarged in the adjacent right panels. Scale bars: 1 cm (A, E), 200 μm (B, F), 100 μm (C, D, G), and 10 μm (H).

## S5 Fig. Effect of oxygen concentration on isolated STs and tissue masses.

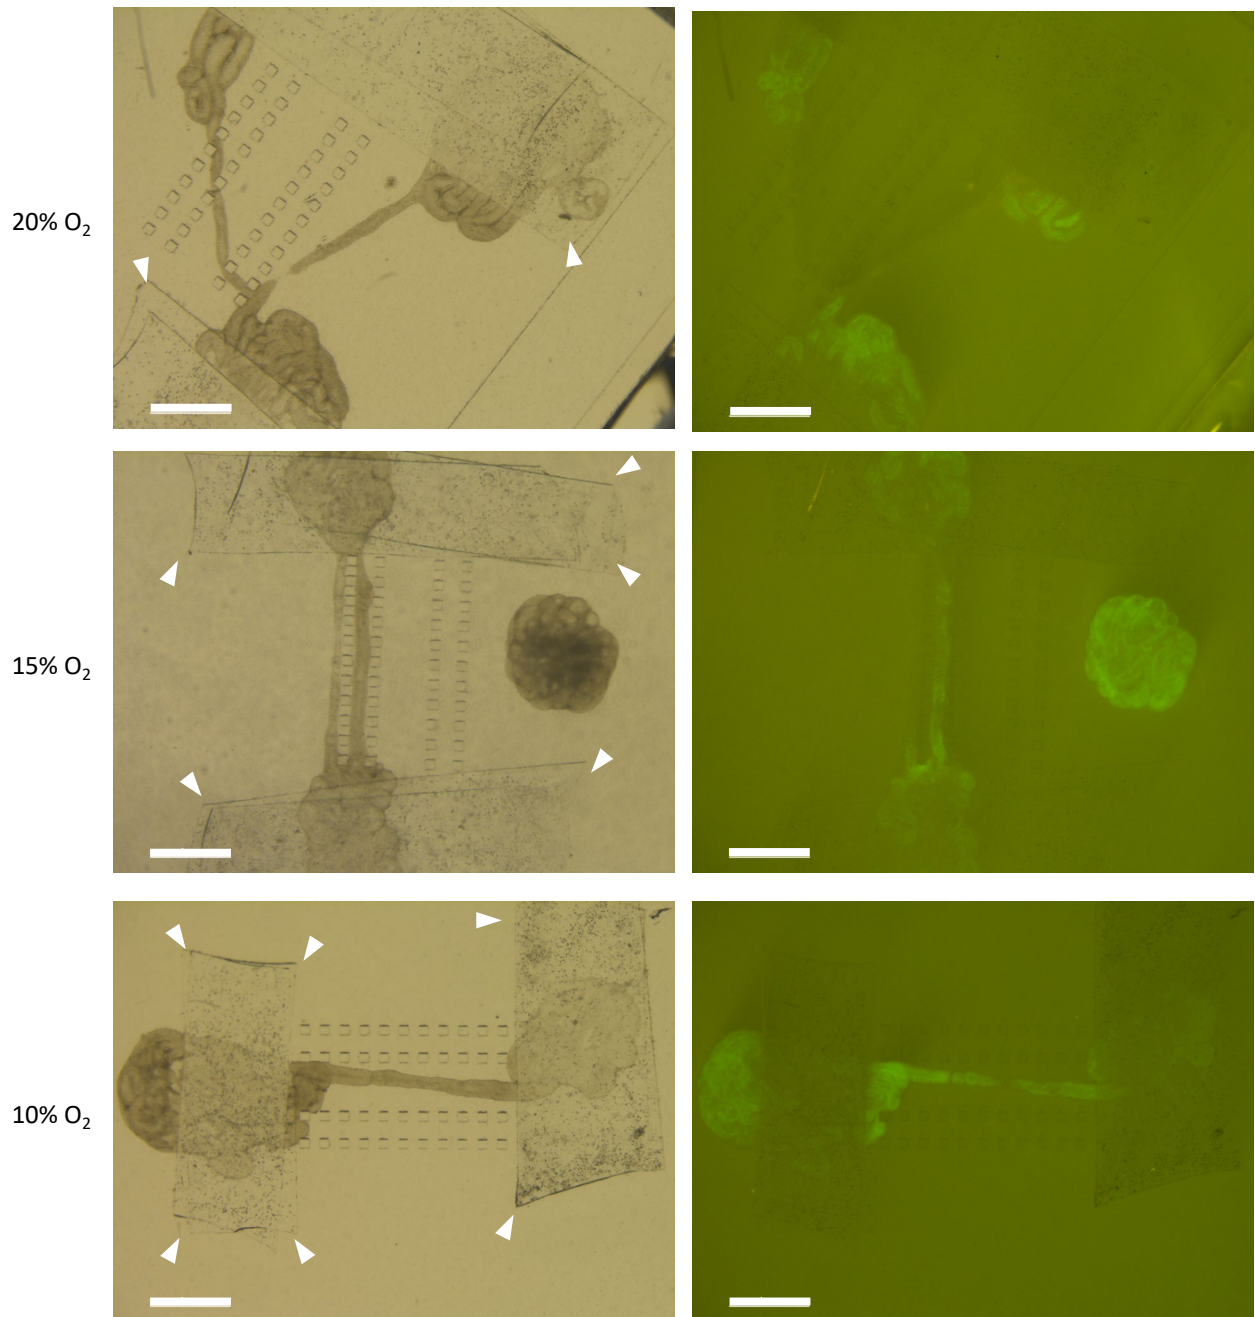

### Effect of oxygen concentration on an isolated ST and tissue mass

Tissue masses showed a wide area of *Acr*-GFP expression, irrespective of O<sub>2</sub> concentration. The linearly isolated ST segments showed little GFP emission at 20% O<sub>2</sub>, while those in 15% and 10% O<sub>2</sub> showed GFP. Polycarbonate porous membranes (arrowheads) were placed between the tissue mass and PDMS ceiling to hold the tissue in place. Scale bar: 1 mm.

**S6 Fig. Culture methods summary.**

|              |                                   | Acr-GFP positive rate (%) * |        |                    |        |                    |        |
|--------------|-----------------------------------|-----------------------------|--------|--------------------|--------|--------------------|--------|
|              |                                   | 20% O <sub>2</sub>          |        | 15% O <sub>2</sub> |        | 10% O <sub>2</sub> |        |
| PC           | (1) Cut-isolated conglomerated ST | 7 / 132                     | ( 5.3) |                    |        |                    |        |
|              | (2) Uncut-isolated ST (STPC chip) | 16 / 36                     | (44.4) | 31/41              | (75.6) | 25/27              | (92.6) |
|              |                                   | 24 / 45                     | (53.3) |                    |        |                    |        |
|              | (3) Tissue mass culture           | 117 / 130                   | (90.0) |                    |        |                    |        |
| Soft agarose | (4) Cut-isolated ST               | 72 / 268                    | (26.9) |                    |        |                    |        |
|              | (5) ST aggregate                  | 55 / 90                     | (61.1) |                    |        |                    |        |

\* Acr-GFP positivity of each sample was determined by whether or not the GFP-positive area comprised 10% or more of the total area.

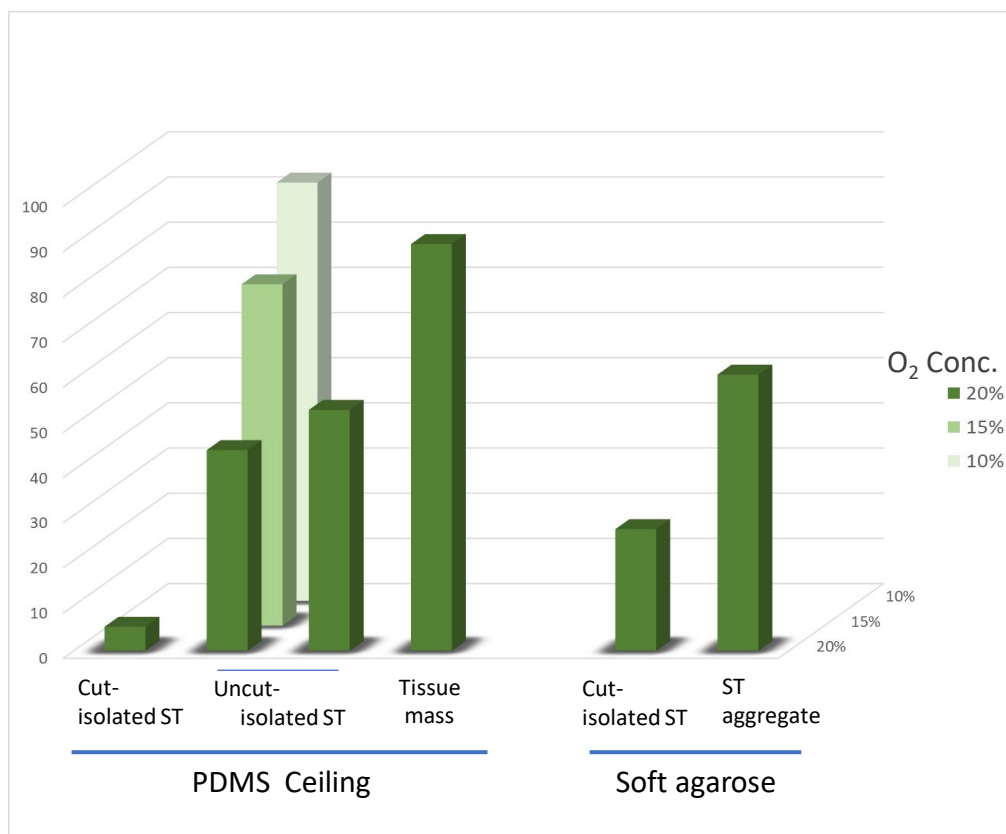

## S1 Table. Antibodies used in this study.

### Antibodies used in this study.

| Antibody                                                                   | Provider                  | Catalog number | Batch Number | Dilution |
|----------------------------------------------------------------------------|---------------------------|----------------|--------------|----------|
| Rabbit anti-RFP polyclonal antibody                                        | MBL                       | PM005          | 044          | 1:1000   |
| Alexa Fluor 555 donkey anti-rabbit IgG                                     | Thermo Fischer Scientific | A-31572        | 2088692      | 1:200    |
| Anti-GFP rabbit polyclonal antibody conjugated with Alexa Fluor 488        | Thermo Fischer Scientific | A-21311        | 2207528      | 1:50     |
| Lectin PNA from <i>Arachis hypogea</i> (peanut), Alexa Fluor 647 conjugate | Thermo Fischer Scientific | L32460         | 1005954      | 1:400    |
| Chicken anti-GFP antibody                                                  | Abcam                     | ab13970        | GR3361051-13 | 1:1000   |
| Mouse anti-SYCP3 antibody                                                  | Abcam                     | ab97672        | GR191517-1   | 1:500    |
| Goat anti-GFR $\alpha$ 1 antibody                                          | R&D Systems               | AF560          | BQE0518031   | 1:200    |
| Rabbit anti-STRA8 antibody                                                 | Abcam                     | ab49602        | GR32540003   | 1:250    |
| Recombinant Anti-gamma H2AX antibody                                       | Abcam                     | ab 81299       | GR93354-25   | 1:500    |
| Rabbit anti-mouse HSD3 $\beta$ polyclonal antibody                         | Trans Genic Inc.          | KO 607         | TG 060813    | 1:250    |
